# Supplementary material for: Sow Vaccination with a Protein Fragment against Virulent Glaesserella (Haemophilus) parasuis Modulates Immunity Traits in Their Offspring
Source: MDPI journal article supplement (doi:10.3390/vaccines9050534), 2021-05-20
Supplement: s1 [file s1]

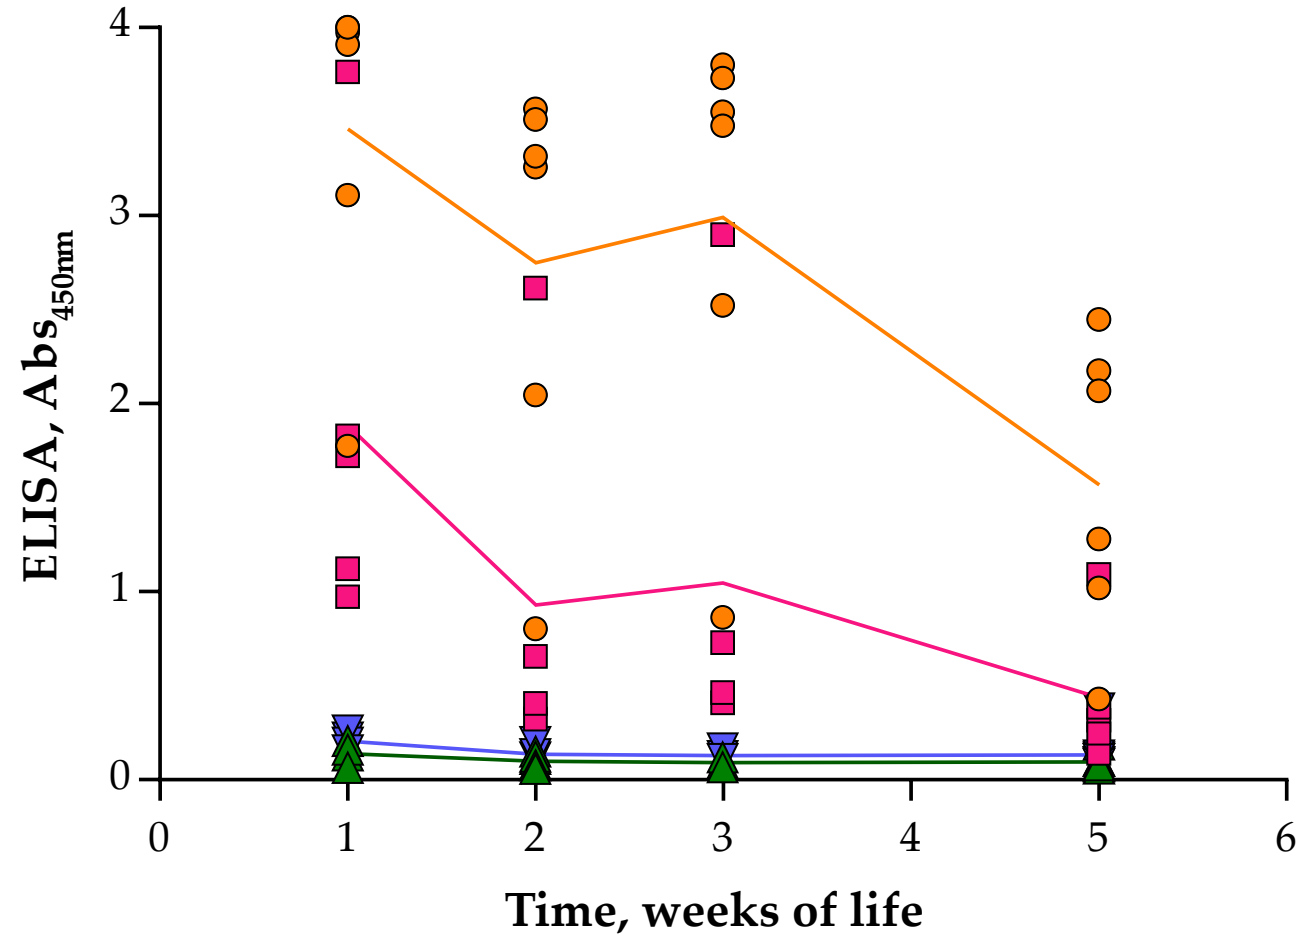

**Figure S1. Levels of IgG against F4 in samples from individual piglets.** Piglets from two vaccinated sows (vaccinated with F4 at 4 and 2 weeks before farrowing; pink and orange symbols and lines) and from two non-vaccinated sows were studied (blue and green symbols and lines). Serum samples from the piglets were taken at 1, 2, 3 and 5 weeks of life and tested for F4 antibodies by ELISA. At 22 days of life, piglets were challenged with *G. parasuis*. The average absorbance in the ELISA of the piglets from each biological sow is shown in the graph (lines).

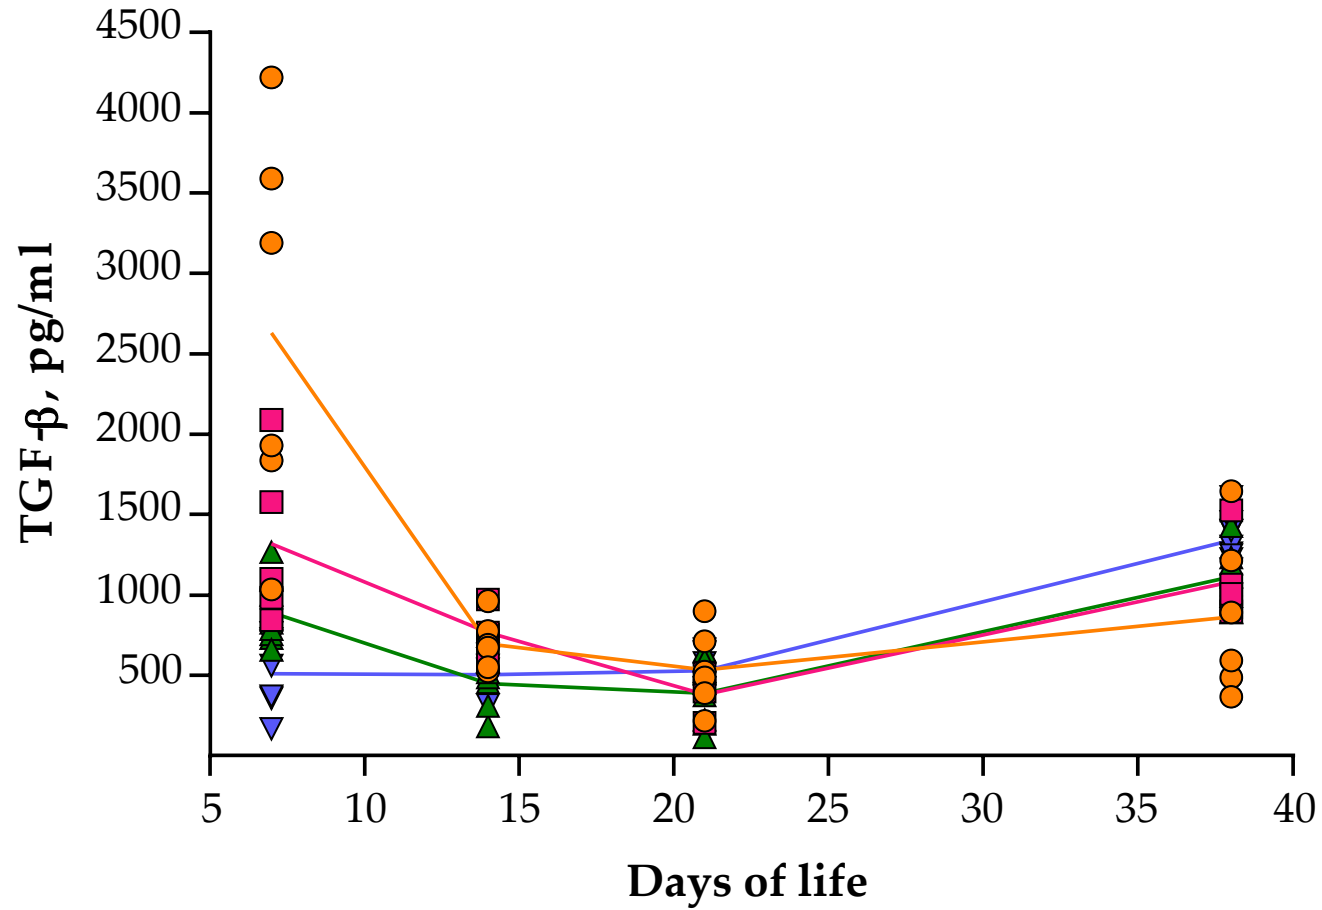

**Figure S2. Levels of TGF- $\beta$  in samples from individual piglets.** Piglets from two vaccinated sows (vaccinated with F4 at 4 and 2 weeks before farrowing; pink and orange symbols and lines) and from two non-vaccinated sows were studied (blue and green symbols and lines). Serum samples from the piglets were taken at 1, 2, 3 and 5 weeks of life and the level of TGF- $\beta$  was determined. At 22 days of life, piglets were challenged with *G. parasuis*. The average quantity of TGF- $\beta$  of the piglets from each biological sow is shown in the graph (lines).

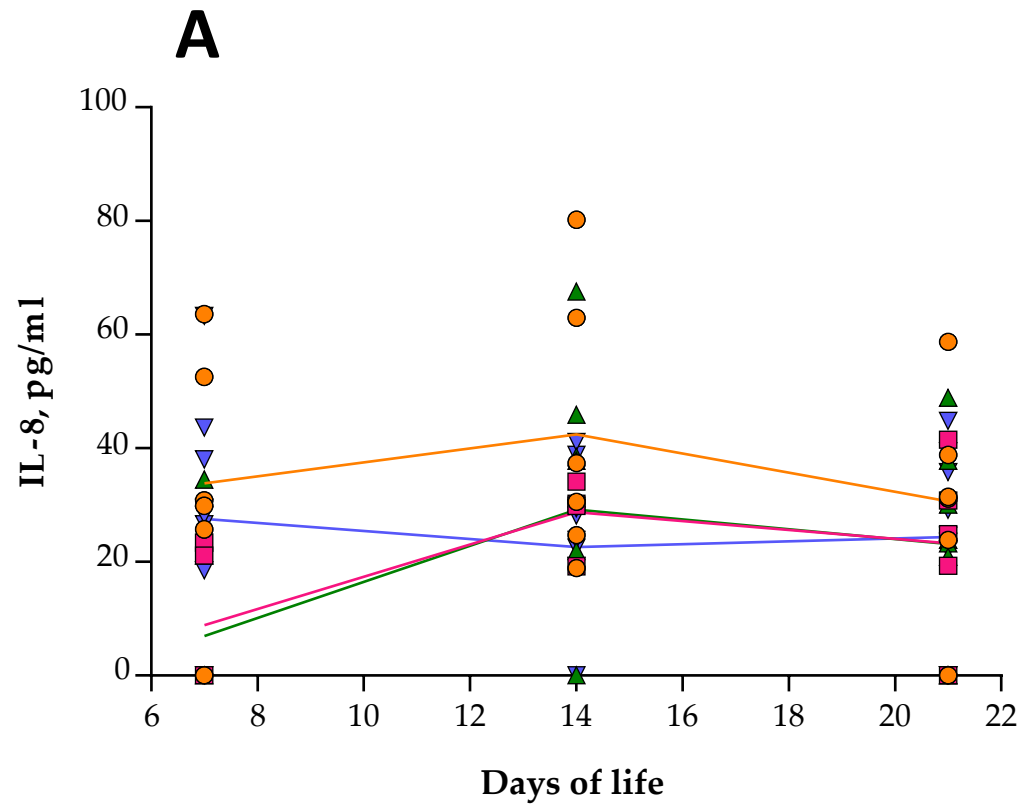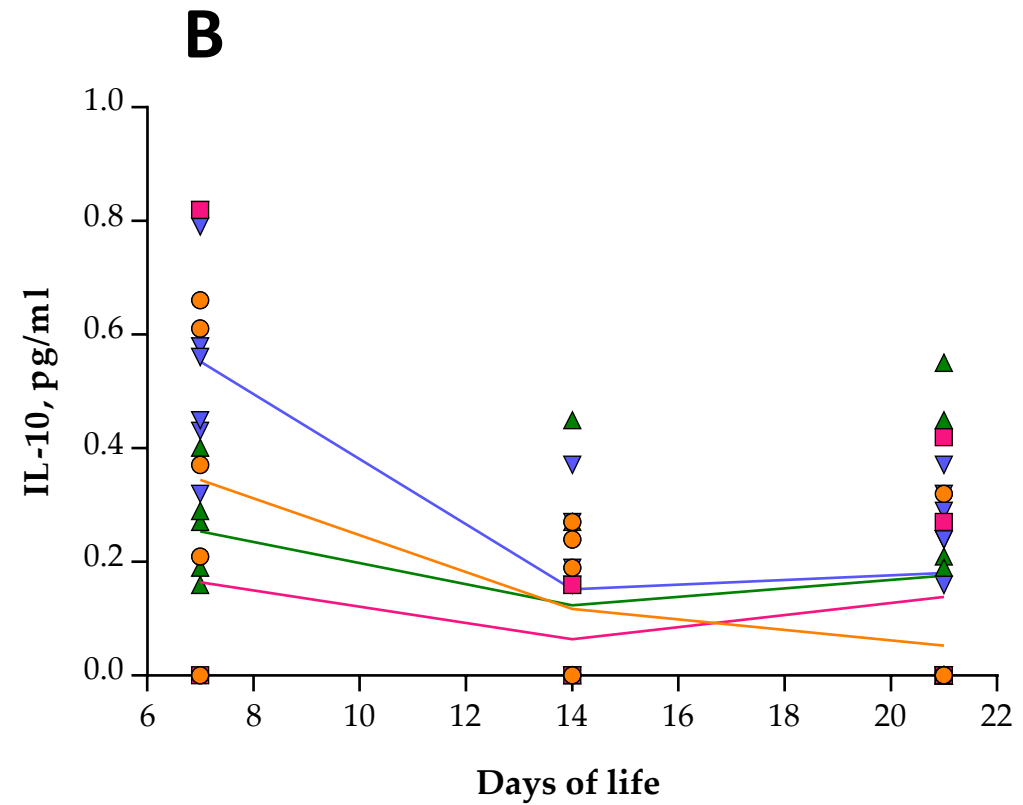

**Figure S3. Levels of IL-8 (A) and IL-10 (B) in samples from individual piglets.** Piglets from two vaccinated sows (vaccinated with F4 at 4 and 2 weeks before farrowing; pink and orange symbols and lines) and from two non-vaccinated sows were studied (blue and green symbols and lines). Serum samples from the piglets were taken at 7, 15, 21 days of life and the levels of IL-8 (A) and IL-10 (B) were determined. The average quantity of IL-8 (A) and IL-10 (B) of the piglets from each biological sow is shown in the graph (lines).

**Table S1.** Primers used in the study for detection of *Glaesserella parasuis*

| Primer         | Sequence (5'-3')              | Description                                                 |
|----------------|-------------------------------|-------------------------------------------------------------|
| AV1-F          | AAATATTTAGAGTTATTTGGAGTC      | Detection of virulent and non-virulent strains <sup>a</sup> |
| V1-R           | AATATACCTAGTAATACTAGACTTAAAAG |                                                             |
| NV1-R          | CAGAATAAGCAAAATCAGC           |                                                             |
| <i>wcwK</i> -F | CCACTGGATAGAGAGTGGCAGG        | Detection of serovar 5/12 strains <sup>b</sup>              |
| <i>wcwK</i> -R | CCATACATCTGAATTCCTAAGC        |                                                             |
| <i>gltP</i> -F | GCTGGAGGAGTTGAAAGAGTTGTTAC    | Detection of serovar 13 strains <sup>b</sup>                |
| <i>gltP</i> -R | CAATCAAATGAAACAACAGGAAGC      |                                                             |

Galofré-Milà, N.; Correa-Fiz, F.; Lacouture, S.; Gottschalk, M.; Strutzberg-Minder, K.; Bensaid, A.; Pina-Pedrero, S.; Aragon, V. A Robust PCR for the differentiation of potential virulent strains of *Haemophilus parasuis*. BMC Vet. Res. 2017, 13, 1–5, doi:10.1186/s12917-017-1041-4.

<sup>b</sup> Howell, K.J.; Peters, S.E.; Wang, J.; Hernandez-Garcia, J.; Weinert, L.A.; Luan, S.L.; Chaudhuri, R.R.; Angen, Ø.; Aragon, V.; Williamson, S.M.; et al. Development of a multiplex PCR assay for rapid molecular serotyping of *Haemophilus parasuis*. J. Clin. Microbiol. 2015, 53, 3812–3821, doi:10.1128/JCM.01991-15
